# Supplementary material for: Nutrition transition among adolescents of a south-Mediterranean country: dietary patterns, association with socio-economic factors, overweight and blood pressure. A cross-sectional study in Tunisia
Source: Springer Nature journal article supplement (doi:10.1186/1475-2891-10-38), 2011-04-24
Supplement: 12937_2010_358_MOESM4_ESM.pdf [file 12937_2010_358_MOESM4_ESM.pdf]

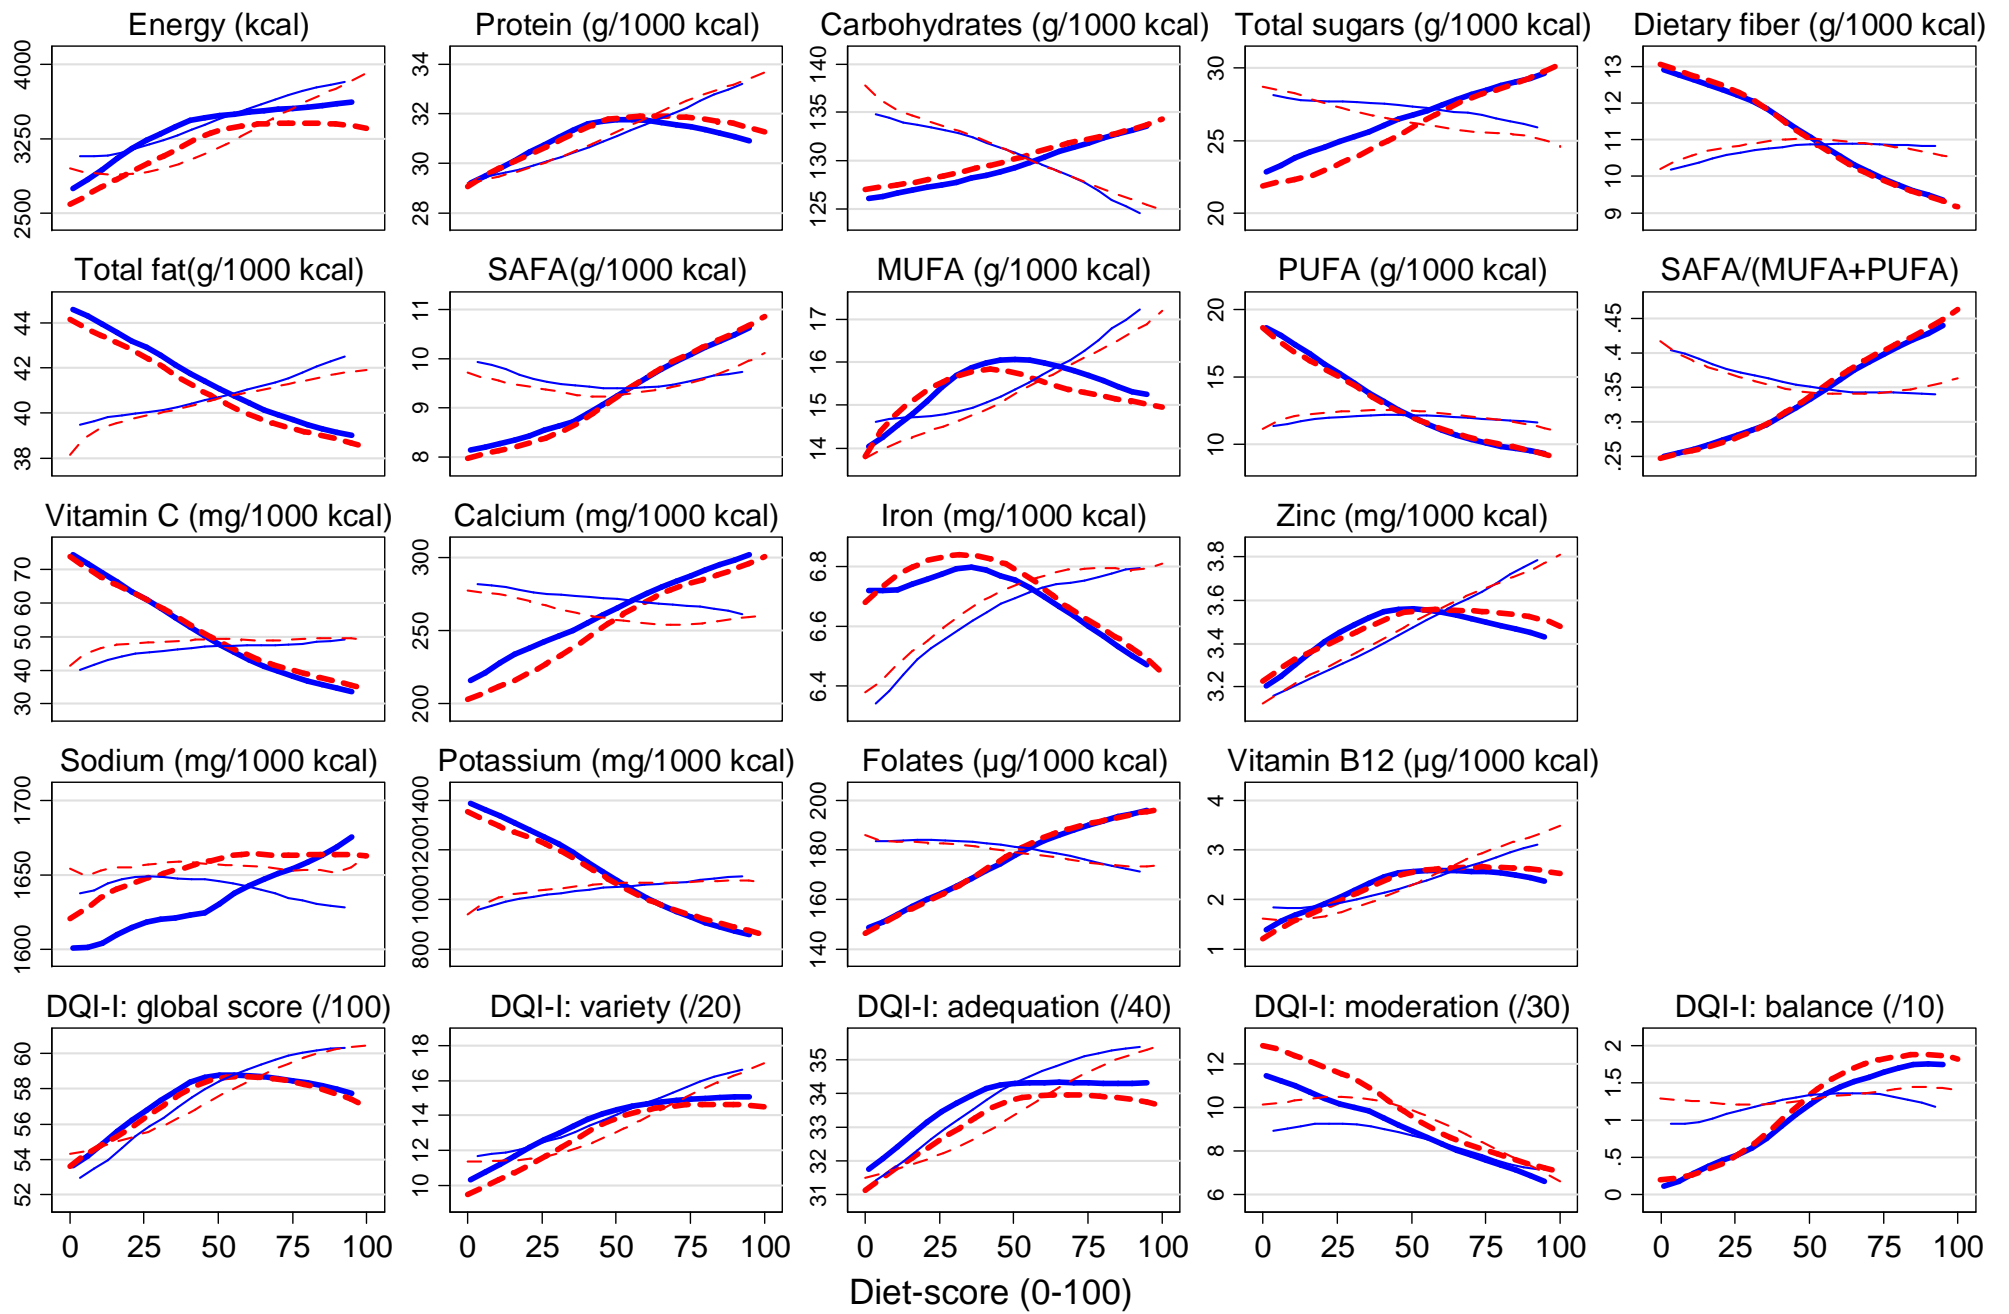

————— : modern diet score, male     
 - - - - - : modern diet score, female  
————— : meat-fish diet score, male     
 - - - - - : meat-fish diet score, female

SAFA: saturated fat - MUFA: mono unsaturated fat - PUFA : poly unsaturated fat - DQI-I : diet quality index international
